# Supplementary material
Source: PubMed Central journal article supplement (PMC3755034)
Supplement: NIHMS494189-supplement-01.pdf [file NIHMS494189-supplement-01.pdf]

**Table S1**

|               | <b>Non-Diabetic (Mean±SEM, N=15-18)</b>                                  |                              | <b>Diabetic (Mean±SEM, N=15-17)</b> |                              |
|---------------|--------------------------------------------------------------------------|------------------------------|-------------------------------------|------------------------------|
|               | <b>Weight (Kg)</b>                                                       | <b>Blood Glucose (mg/dL)</b> | <b>Weight (Kg)</b>                  | <b>Blood Glucose (mg/dL)</b> |
| <b>Days</b>   | <b>Comparisons made between non-diabetic and diabetic (**P&lt;0.001)</b> |                              |                                     |                              |
| <b>Day 0</b>  | 3.115 ± 0.057                                                            | 176.595 ± 11.625             | 3.253 ± 0.068                       | 176.595 ± 11.625             |
| <b>Day 10</b> | 3.3 ± 0.048                                                              | 175.800 ± 7.900              | 3.082 ± 0.079                       | <b>394.000 ± 18.794 ***</b>  |
| <b>Day 20</b> | 3.24 ± 0.054                                                             | 162.684 ± 5.728              | 3.118 ± 0.074                       | <b>383.412 ± 19.491 ***</b>  |

**Table S2**

| Days          | Sham                                                                    |                        | Ischemic                                   |                     | Neuroischemic |          |
|---------------|-------------------------------------------------------------------------|------------------------|--------------------------------------------|---------------------|---------------|----------|
|               | Non-Diabetic                                                            | Diabetic               | Non-Diabetic                               | Diabetic            | Non-Diabetic  | Diabetic |
|               | % of original wound size (Mean±SEM, N=15-18)                            |                        | % of original wound size (Mean±SEM, N=5-6) |                     |               |          |
|               | Comparisons made between non-diabetic and diabetic (**P<0.001, *P<0.05) |                        |                                            |                     |               |          |
| <b>Day 12</b> | 100±0.0                                                                 | 100±0.0                | 100±0.0                                    | 100±0.0             | 100±0.0       | 100±0.0  |
| <b>Day 15</b> | 86.67±2.04                                                              | <b>104.67±3.04 ***</b> | 84.91±1.6                                  | <b>94.29±2.57 *</b> | 90.54±2.14    | 94.8±3.2 |
| <b>Day 20</b> | 53±3.23                                                                 | <b>78.801±4 ***</b>    | 76.5±3.4                                   | <b>89.00±4.45 *</b> | 81.92±2.28    | 86±3.9   |

Table S3

|                     | Baseline                                                                           |                                                            | Sham                                                              |                     | Ischemic     |                       | Neuroischemic |                     |
|---------------------|------------------------------------------------------------------------------------|------------------------------------------------------------|-------------------------------------------------------------------|---------------------|--------------|-----------------------|---------------|---------------------|
|                     | Non-Diabetic                                                                       | Diabetic                                                   | Non-Diabetic                                                      | Diabetic            | Non-Diabetic | Diabetic              | Non-Diabetic  | Diabetic            |
|                     | (Mean±SEM, N=15-18)                                                                | Fold Change Over Non-Diabetic Baseline (Mean±SEM, N=15-17) | Fold Change Over Non-Diabetic/Diabetic Baseline (Mean±SEM, N=5-6) |                     |              |                       |               |                     |
|                     | Comparisons made between non-diabetic and diabetic (***P<0.001, **P<0.01, *P<0.05) |                                                            |                                                                   |                     |              |                       |               |                     |
| <b>Infiltration</b> |                                                                                    |                                                            |                                                                   |                     |              |                       |               |                     |
| <b>Extent</b>       | 1.0±0.028                                                                          | <b>1.325±0.067 *</b>                                       | 2.92±0.20                                                         | <b>1.8±0.15 ***</b> | 2.7±0.106    | <b>1.546±0.22 ***</b> | 4.06±0.21     | <b>2.26±0.32 **</b> |

**Table S4**

| <b>M1/M2<br/>Ratio</b> | <b>Baseline</b>                                                                                    |                                                                       | <b>Sham</b>                                                              |                        | <b>Ischemic</b>     |                        | <b>Neuroischemic</b> |                       |
|------------------------|----------------------------------------------------------------------------------------------------|-----------------------------------------------------------------------|--------------------------------------------------------------------------|------------------------|---------------------|------------------------|----------------------|-----------------------|
|                        | <b>Non-Diabetic</b>                                                                                | <b>Diabetic</b>                                                       | <b>Non-Diabetic</b>                                                      | <b>Diabetic</b>        | <b>Non-Diabetic</b> | <b>Diabetic</b>        | <b>Non-Diabetic</b>  | <b>Diabetic</b>       |
|                        | <b>(Mean±SEM,<br/>N=7)</b>                                                                         | <b>Fold Change Over<br/>Non-Diabetic Baseline<br/>(Mean±SEM, N=6)</b> | <b>Fold Change Over Non-Diabetic/Diabetic Baseline (Mean±SEM, N=3-6)</b> |                        |                     |                        |                      |                       |
|                        | <b>Comparisons made between non-diabetic and diabetic (***P&lt;0.001, **P&lt;0.01, *P&lt;0.05)</b> |                                                                       |                                                                          |                        |                     |                        |                      |                       |
|                        | 0.338±0.021                                                                                        | <b>1.142±0.084 ***</b>                                                | 0.653±0.054                                                              | <b>1.405±0.048 ***</b> | 0.597±0.062         | <b>1.414±0.099 ***</b> | 0.637±0.091          | <b>1.611±0.196 **</b> |

**Table S5**

| Genes        | Baseline                                                                 |                                                            | Sham                                                              |                      | Ischemic     |                     | Neuroischemic |                    |
|--------------|--------------------------------------------------------------------------|------------------------------------------------------------|-------------------------------------------------------------------|----------------------|--------------|---------------------|---------------|--------------------|
|              | Non-Diabetic                                                             | Diabetic                                                   | Non-Diabetic                                                      | Diabetic             | Non-Diabetic | Diabetic            | Non-Diabetic  | Diabetic           |
|              | (Mean±SEM, N=15-18)                                                      | Fold Change Over Non-Diabetic Baseline (Mean±SEM, N=15-17) | Fold Change Over Non-Diabetic/Diabetic Baseline (Mean±SEM, N=5-6) |                      |              |                     |               |                    |
|              | Comparisons made between non-diabetic and diabetic (***P<0.001, *P<0.05) |                                                            |                                                                   |                      |              |                     |               |                    |
| <b>IL-8</b>  | 2.78±0.91                                                                | <b>12.27±2.74 **</b>                                       | 3.36±1.49                                                         | 0.78±0.38            | 6.33±2.7     | <b>0.996±0.25 *</b> | 1.9±0.49      | <b>0.35±0.15 *</b> |
| <b>CXCR1</b> | 4.46±1.65                                                                | <b>54.45±9.85 ***</b>                                      | 6.85±2.74                                                         | <b>0.53±0.13 *</b>   | 18.24±5.3    | <b>1.03±0.18 **</b> | 7.6±3.2       | <b>0.39±0.20 *</b> |
| <b>IL-6</b>  | 2.6±0.75                                                                 | <b>7.12±1.09 *</b>                                         | 1.044±0.248                                                       | <b>0.269±0.08 **</b> | 5.25±2.3     | <b>1.41±0.28 **</b> | 2.76±1.1      | <b>0.16±0.02 *</b> |
| <b>SP</b>    | 2.88±1.06                                                                | 2.78±1.39                                                  | 0.38±0.054                                                        | 0.23±0.11            | 0.42±0.09    | 0.26±0.03           | 0.63±0.18     | <b>0.24±0.09 *</b> |
| <b>NK1R</b>  | 0.75±0.158                                                               | <b>0.39±0.06 *</b>                                         | 1.6±0.63                                                          | 3.57±1.722           | 7.17±5.0     | 8.2±4.73            | 0.1±0.04      | 0.047±0.014        |
| <b>NEP</b>   | 1.98±0.44                                                                | 2.89±1.13                                                  | 4.38±1.2                                                          | 2.99±0.96            | 2.5±1.09     | 1.36±0.356          | 7.99±4.5      | <b>0.96±0.25 *</b> |
| <b>NPY</b>   | 2.22±0.82                                                                | 3.13±0.97                                                  | 1.425±0.66                                                        | 0.47±0.152           | 0.64±0.25    | <b>0.12±0.026 *</b> | 0.67±0.22     | <b>0.13±0.04 *</b> |
| <b>NPY2R</b> | 4.49±1.83                                                                | 13.104±4.23                                                | 2±0.83                                                            | 0.36±0.28            | 4.037±2.79   | 0.46±0.078          | 2.26±2.05     | 0.11±0.03          |
| <b>NPY5R</b> | 5.25±2.1                                                                 | 14.85±4                                                    | 0.66±0.22                                                         | 0.17±0.006           | 1.13±0.363   | 0.3±0.067           | 1.77±1.56     | 0.11±0.04          |
| <b>DPPIV</b> | 2.3±0.96                                                                 | <b>6.14±1.5 *</b>                                          | 1.04±0.17                                                         | <b>0.51±0.085 *</b>  | 1.51±0.198   | <b>0.97±0.17 *</b>  | 0.58±0.07     | 0.6±0.073          |

**Table S6**

| Proteins     | Baseline                                                                |                                                            | Sham                                                              |                     | Ischemic     |                     | Neuroischemic |                    |
|--------------|-------------------------------------------------------------------------|------------------------------------------------------------|-------------------------------------------------------------------|---------------------|--------------|---------------------|---------------|--------------------|
|              | Non-Diabetic                                                            | Diabetic                                                   | Non-Diabetic                                                      | Diabetic            | Non-Diabetic | Diabetic            | Non-Diabetic  | Diabetic           |
|              | (Mean±SEM, N=15-18)                                                     | Fold Change Over Non-Diabetic Baseline (Mean±SEM, N=15-17) | Fold Change Over Non-Diabetic/Diabetic Baseline (Mean±SEM, N=5-6) |                     |              |                     |               |                    |
|              | Comparisons made between non-diabetic and diabetic (**P<0.001, *P<0.05) |                                                            |                                                                   |                     |              |                     |               |                    |
| <b>IL-8</b>  | 1.0±0                                                                   | 1.103±0.04                                                 | 1.39±0.12                                                         | 1.27±0.07           | 1.49±0.15    | <b>1.081±0.13 *</b> | 1.037±0.28    | 0.9±0.04           |
| <b>CXCR1</b> | 1.0±0                                                                   | 0.99±0.08                                                  | 1.19±0.15                                                         | 1±0.07              | 1.6±0.21     | 1.215±0.15          | 1.74±0.10     | 1.45±0.19          |
| <b>IL-6</b>  | 1±0.084                                                                 | 1.13±0.07                                                  | 1.53±0.11                                                         | <b>1.036±0.07 *</b> | 1.24±0.12    | <b>0.825±0.05 *</b> | 1.96±0.16     | <b>1.21±0.11 *</b> |
| <b>SP</b>    | 1±0.034                                                                 | <b>0.609±0.04 ***</b>                                      | 0.94±0.05                                                         | 1.22±0.09           | 0.84±0.13    | 1.26±0.10           | 1.36±0.17     | <b>0.92±0.08 *</b> |
| <b>NK1R</b>  | 1.0±0                                                                   | 1.05±0.04                                                  | 0.96±0.14                                                         | 1.082±0.11          | 1.2±0.07     | <b>1.73±0.12 *</b>  | 1.15±0.122    | 0.88±0.08          |
| <b>NEP</b>   | 1.0±0                                                                   | 1.16±0.23                                                  | 1.146±0.13                                                        | 1.22±0.13           | 2.21±0.74    | 1.55±0.27           | 1.6±0.18      | 1.58±0.13          |
| <b>NPY</b>   | 1±0.104                                                                 | <b>0.6±0.06 ***</b>                                        | 1.231±0.11                                                        | 1.42±0.09           | 0.86±0.14    | 1.35±0.17           | 1±0.5         | 1.55±0.22          |
| <b>NPY2R</b> | 1.0±0                                                                   | 1.01±0.16                                                  | 1.097±0.25                                                        | 1.25±0.17           | 1.84±0.54    | 1.406±0.18          | 1.04±0.12     | <b>1.63±0.06 *</b> |
| <b>NPY5R</b> | 1.0±0                                                                   | 0.98±0.12                                                  | 0.99±0.15                                                         | 1.18±0.18           | 1.23±0.23    | 1.56±0.04           | 1.33±0.16     | 1.58±0.12          |
| <b>DPPIV</b> | 1.0±0                                                                   | <b>1.68±0.34 *</b>                                         | 0.9±0.09                                                          | 0.855±0.69          | 1.076±0.21   | 0.71±0.15           | 0.91±0.15     | 0.76±0.02          |

**Table S7**

| <b>Gene</b>                               | <b>Q-RT-PCR Primer Sequences</b>                                         |
|-------------------------------------------|--------------------------------------------------------------------------|
| <b>IL-8</b>                               | F: CTC TGC TGG CTG CCC TAC<br>R: CTG ACA CGT CTC CTG GAT CA              |
| <b>CXCR1</b>                              | F: GGC GCT GTC TCT GAT TTT GT<br>R: GGC TGG AAT TGT TTG GAG AA           |
| <b>IL-6</b>                               | F: GTC AGC CTG ATG GAG AAC CT<br>R: GGA TGA AGT GGA TCG TGG TC           |
| <b>Substance P (Pre-pro-Tachykinin A)</b> | F: TGT GTC TCA GGG CTG AAA TG<br>R: TAT GGA ACC ACA AAC CGT GA           |
| <b>NK1R</b>                               | F: TTG GCC CAC AAG AGA ATG AGG ACA<br>R: AGT ACC ACT CGT TGT GGA CAG CAT |
| <b>NEP</b>                                | F: TGT GCA CAG TCC AGG CAA TTT CAG<br>R: TTC TGT AGA TCA CAA AAC CCG GCA |
| <b>NPY (Pre-pro-NPY)</b>                  | F: CCA GCC CAG AGA CAC TGA TT<br>R: ACA TTG CAG GGT CTT CAA GC           |
| <b>NPY2R</b>                              | F: AAA TGA TGG TGT GTG TGG TGG TGG<br>R: AGT TGC TGT TCA TCC AGC CGT AGA |
| <b>NPY5R</b>                              | F: TAA CAG CCA ACC ACG GCT ACT TCT<br>R: TCC TGC AGT TCC ACA AGA CTG TGA |
| <b>DPPIV</b>                              | (SABiosciences Qiagen, Valencia, CA Cat # PPH00035A)                     |
| <b>Beta-actin</b>                         | F: TGT ATG AAG GCT TTT GCT CTC C<br>R: CTG GTC TCA AGT CAG TGT ACA GGT   |

**Table S8**

| <b>Western Blot Reagents</b>         |                     |                       |                       |                           |                           |                       |                       |
|--------------------------------------|---------------------|-----------------------|-----------------------|---------------------------|---------------------------|-----------------------|-----------------------|
| <b>Antibody</b>                      | <b>Company</b>      | <b>Catalog number</b> | <b>Dilution</b>       | <b>Secondary Antibody</b> | <b>Company</b>            | <b>Catalog number</b> | <b>Dilution</b>       |
| CXCR1                                | R&D Systems, MN     | MAB 330               | 1:100                 | Goat-Anti Mouse           | R&D Systems, MN           | HAF007                | 1:500                 |
| NK1R                                 | SCBT, CA            | SC 14115              | 1:100                 | Donkey-Anti Goat          | SCBT, CA                  | SC2020                | 1:500                 |
| NEP                                  | R&D Systems, MN     | MAB 1182              | 1:100                 | Rabbit-Anti Mouse         | Sigma Aldrich, MO         | A9044                 | 1:500                 |
| NPY2R                                | SCBT, CA            | SC 14736              | 1:100                 | Donkey-Anti Goat          | SCBT, CA                  | SC2020                | 1:500                 |
| NPY5R                                | SCBT, CA            | SC 23843              | 1:100                 | Donkey-Anti Goat          | SCBT, CA                  | SC2020                | 1:500                 |
| DPPIV                                | R&D Systems, MN     | AF 1180               | 1:250                 | Donkey-Anti Goat          | SCBT, CA                  | SC2020                | 1:500                 |
| <b>Immunohistochemistry Reagents</b> |                     |                       |                       |                           |                           |                       |                       |
| <b>Antibody</b>                      | <b>Section Type</b> | <b>Company</b>        | <b>Catalog number</b> | <b>Dil</b>                | <b>Secondary Antibody</b> | <b>Company</b>        | <b>Catalog number</b> |
| IL8                                  | OCT-Fr              | Abcam, MA             | AB 10769              | 1:10                      | Anti-goat                 | R&D Systems, MN       | CTS008                |
| IL6                                  | FFPE                | R&D Systems, MN       | MAB 2061              | 1:50                      | Anti-mouse                | Vector Labs, CA       | PK6102                |
| Sub P                                | FFPE                | SCBT, CA              | SC 21715              | 1:25                      | Anti-rat                  | SCBT, CA              | SC 2019               |
| NPY                                  | FFPE                | Abcam, MA             | AB 1583               | 1:1000                    | Anti-sheep (1:100)        | Millipore, MA         | AP 184B               |
| CD177                                | FFPE                | Lifespan Biosciences  | LS-B1953              | 1:15                      | Anti-mouse                | Vector Labs, CA       | PK6102                |
| CD3                                  | FFPE                | BD Biosciences        | 550367                | 1:15                      | Anti-mouse                | Vector Labs, CA       | PK6102                |
| CD18                                 | OCT-Fr              | AbD Serotec, NC       | MCA1780               | 1:15                      | Goat Anti-mouse (1:400)   | AbD Serotec, NC       | STAR117D488GA         |
| HLA-DR                               | OCT-Fr              | Abcam, MA             | ab49388               | 1:100                     | Donkey Anti-mouse (1:400) | Jackson Labs, ME      | 715-507-003           |
| CD206                                | OCT-Fr              | AbD Serotec, NC       | MCA2155               | 1:100                     | Donkey Anti-mouse (1:400) | Jackson Labs, ME      | 715-507-003           |



FFPE= Formalin Fixed Paraffin Embedded, OCT-Fr= OCT-Frozen, SCBT= Santa Cruz Biotechnology Note: CD18-CD206 and CD18-HLA-DR were co-stained using standardized protocol. DAPI (4',6-diamidino-2-phenylindole, dihydrochloride), LIFE TECHNOLOGIES CORPORATION Cat# D1306 was used (1:1000) for staining nuclei

S1A

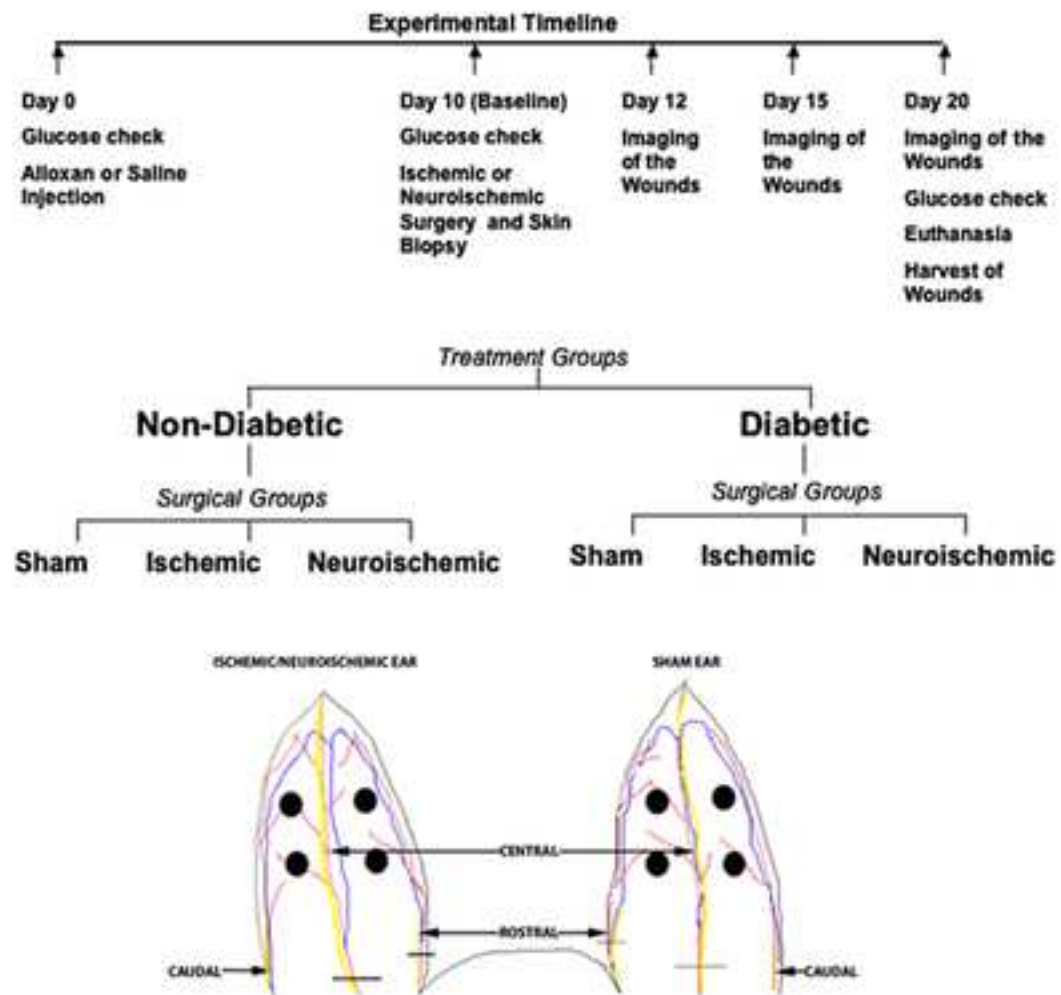

S1B

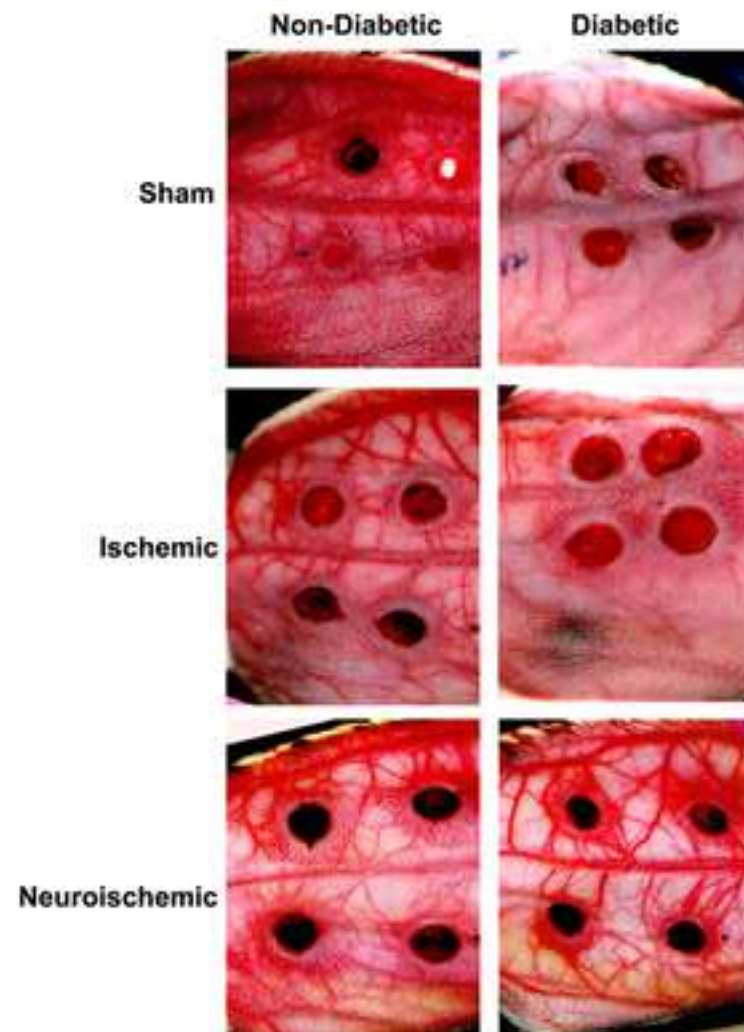



S2

Non-Diabetic

Diabetic

Baseline

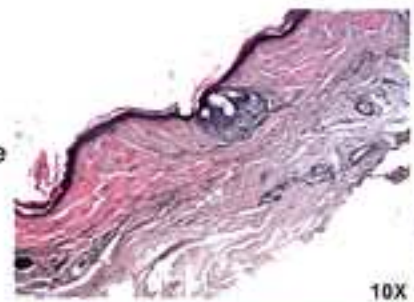

10X

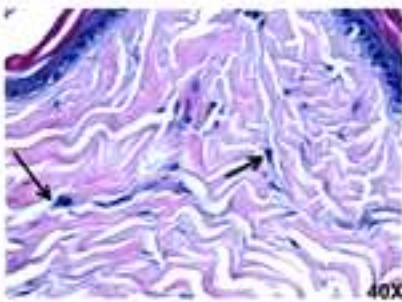

40X

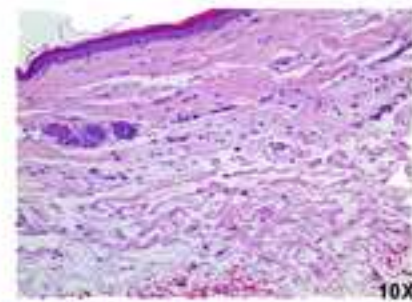

10X

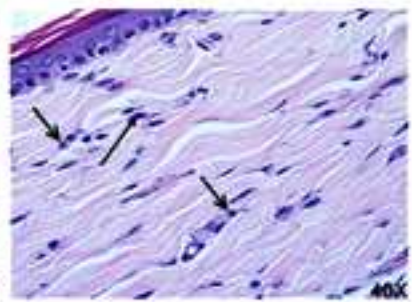

40X

Sham

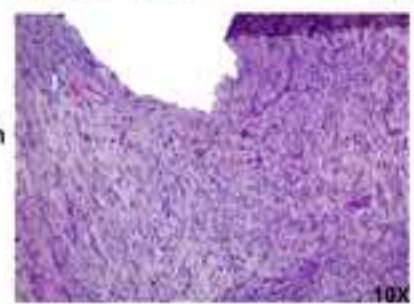

10X

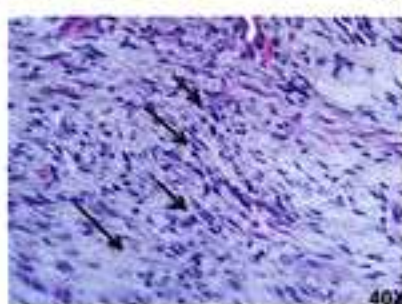

40X

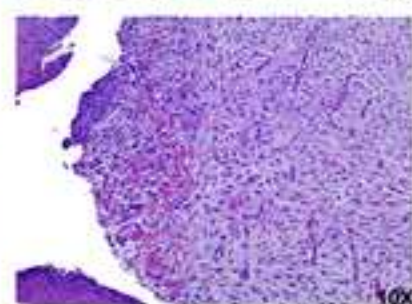

10X

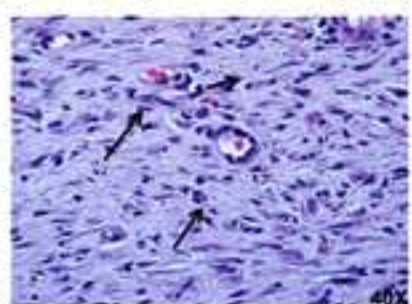

40X

Ischemic

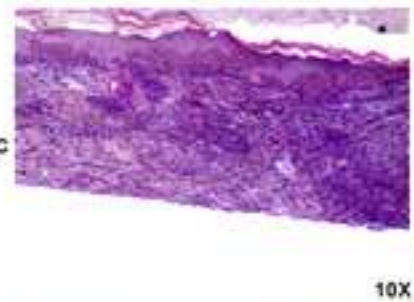

10X

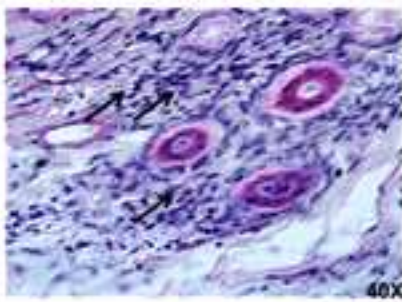

40X

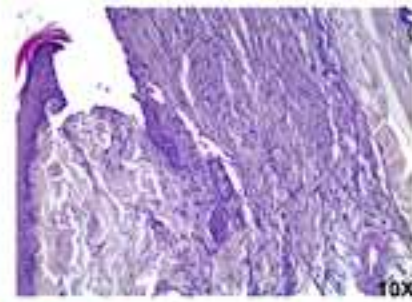

10X

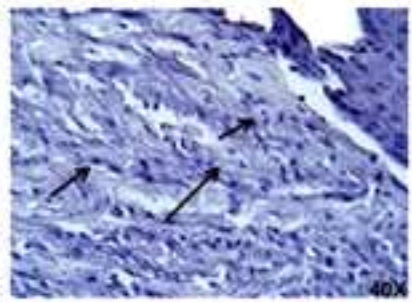

40X

Neuroischemia

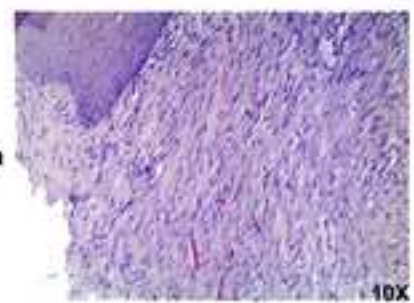

10X

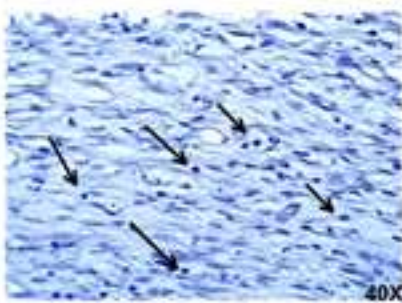

40X

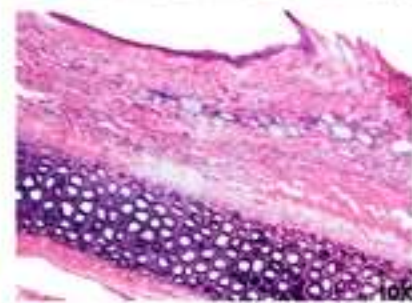

10X

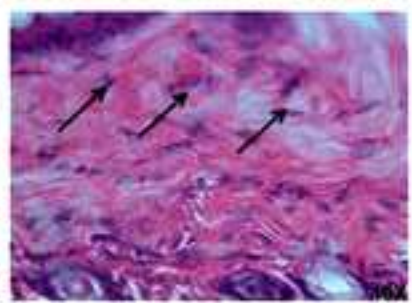

40X



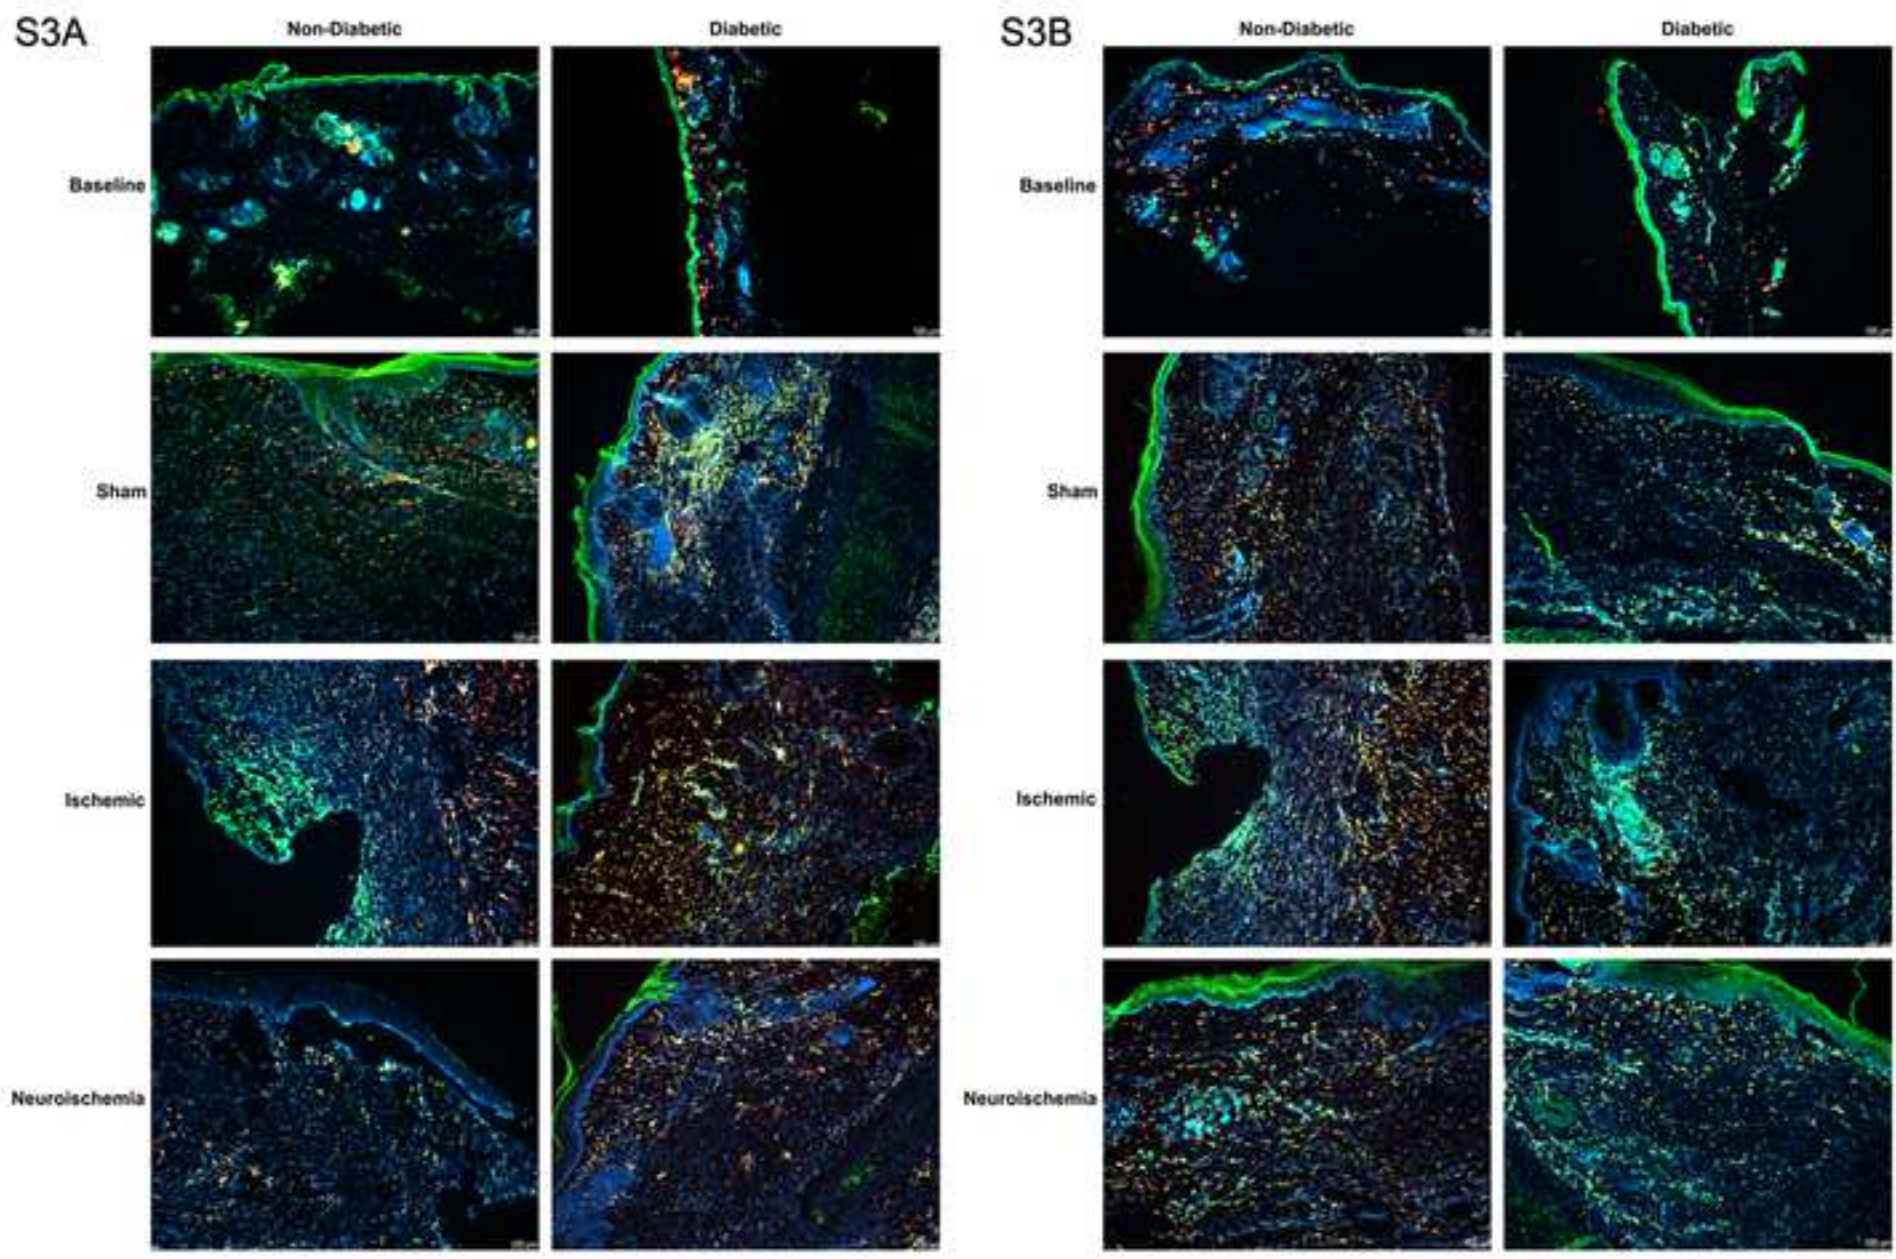

**S4**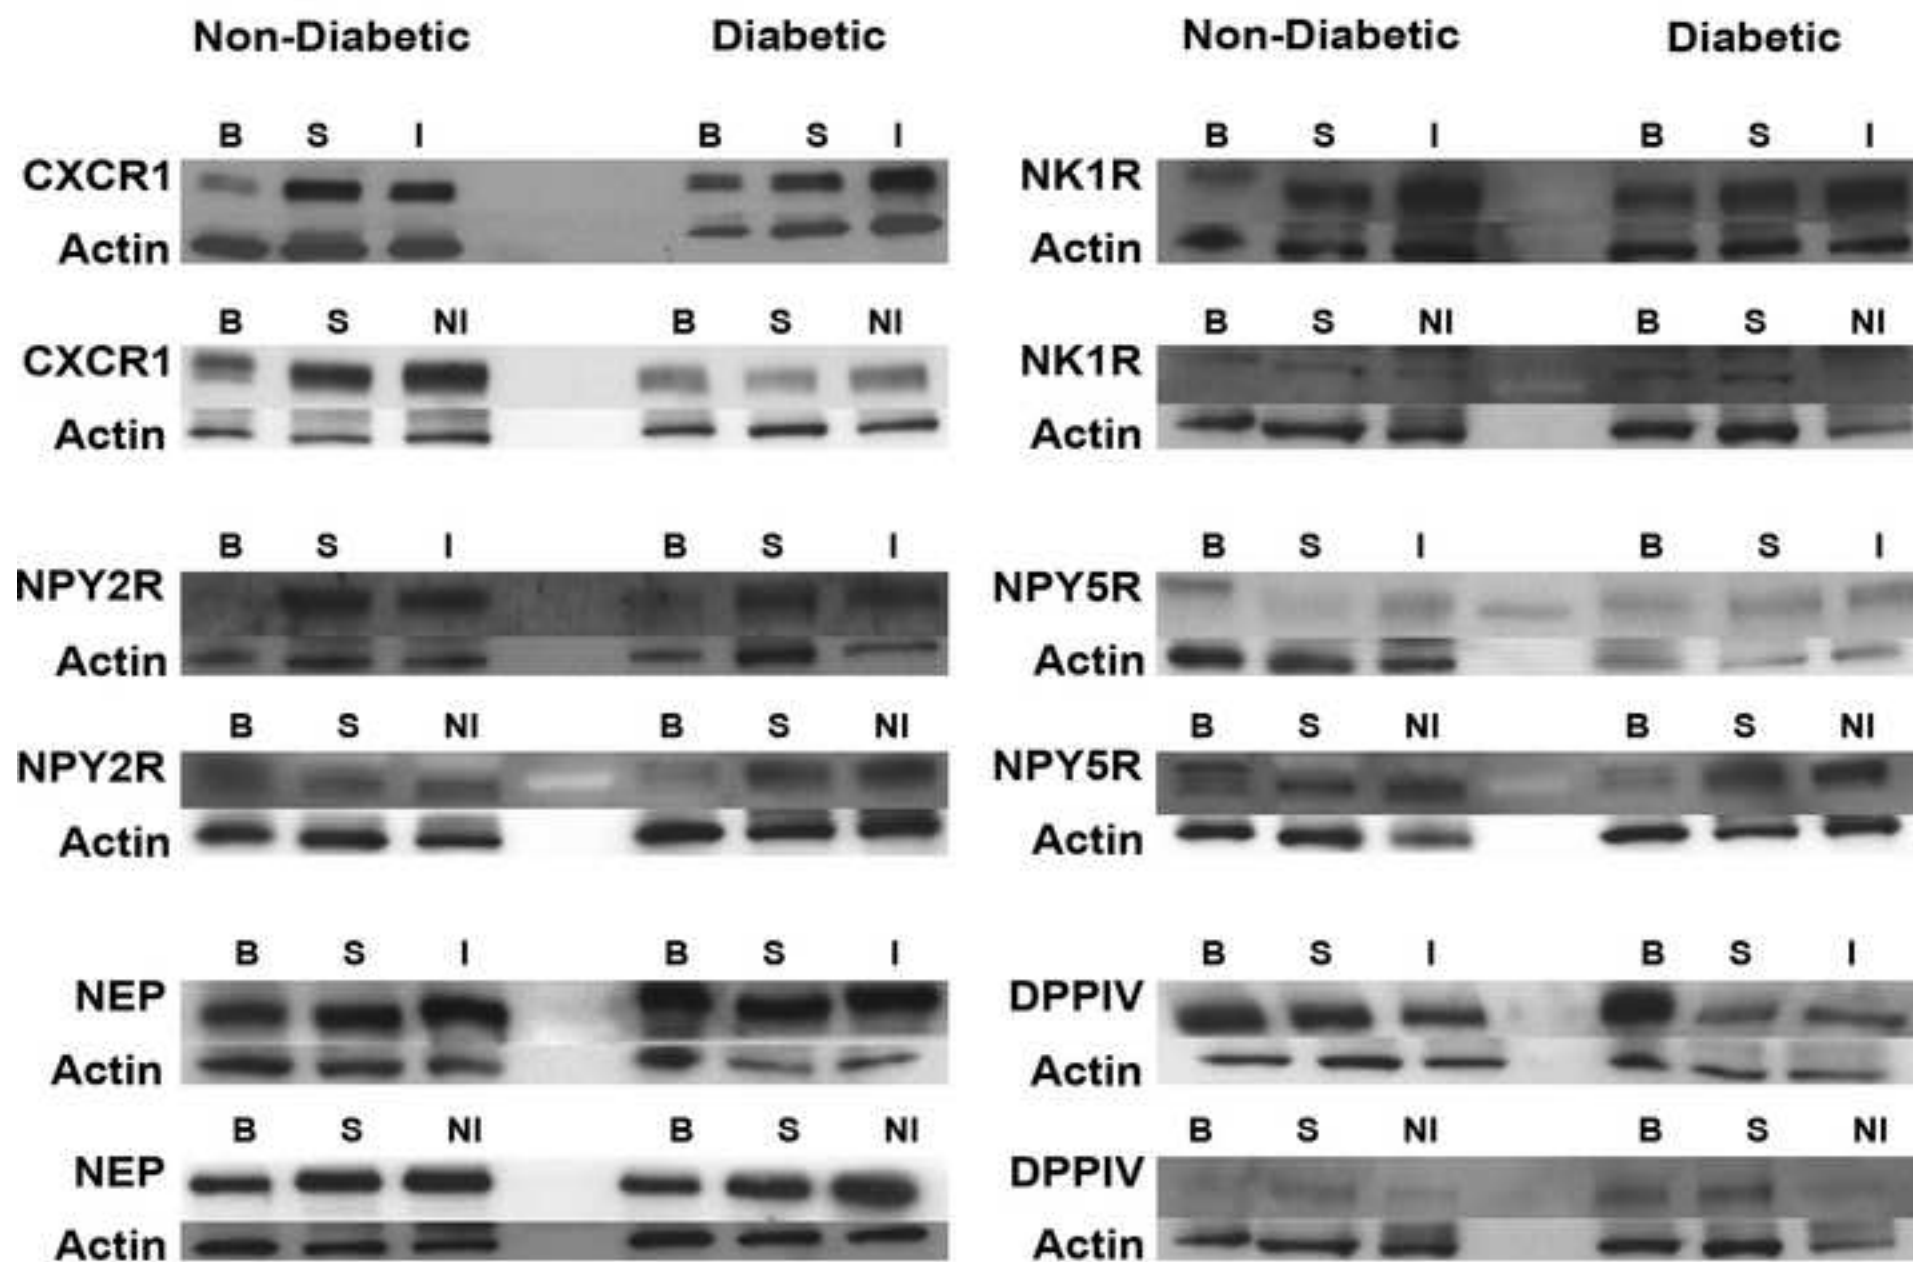



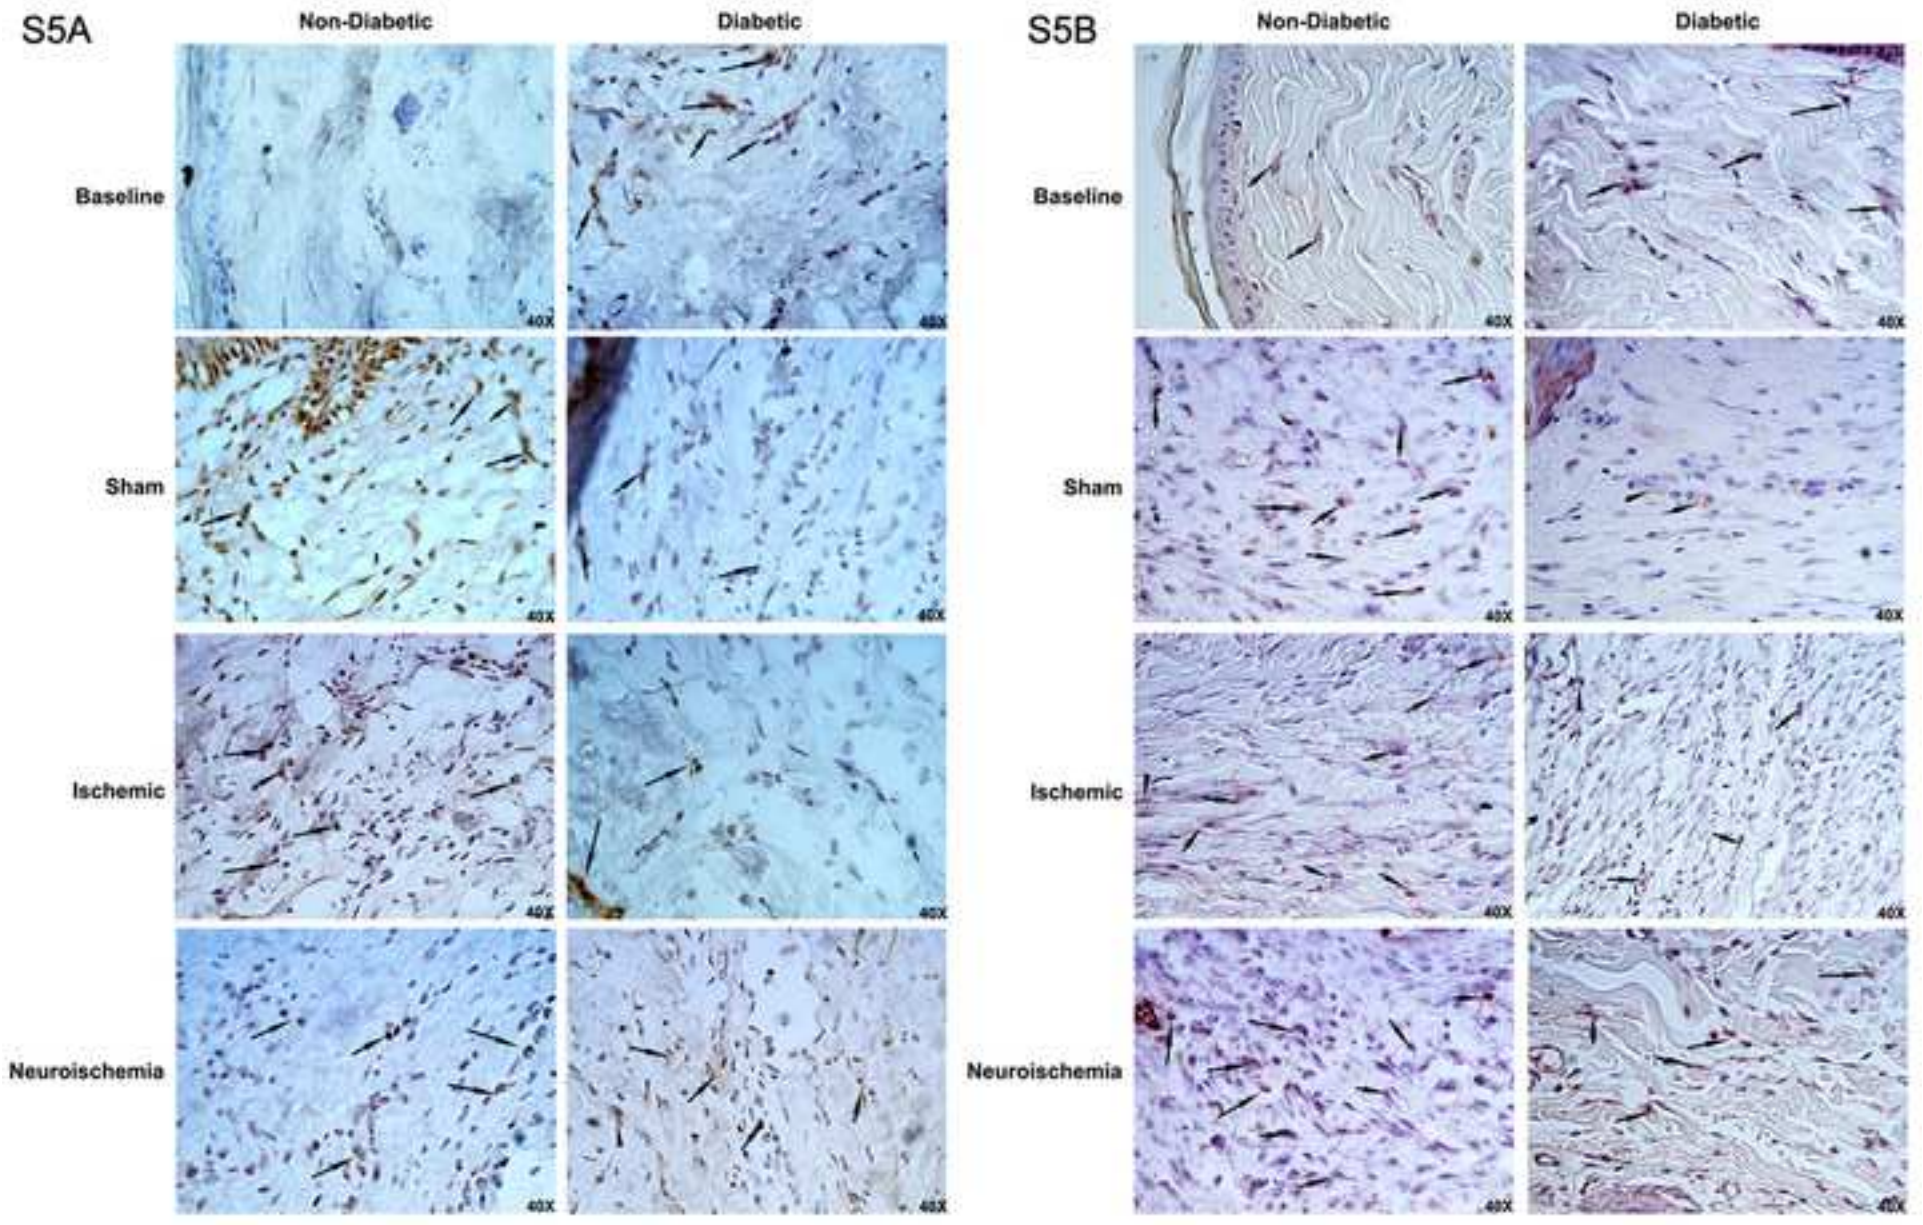



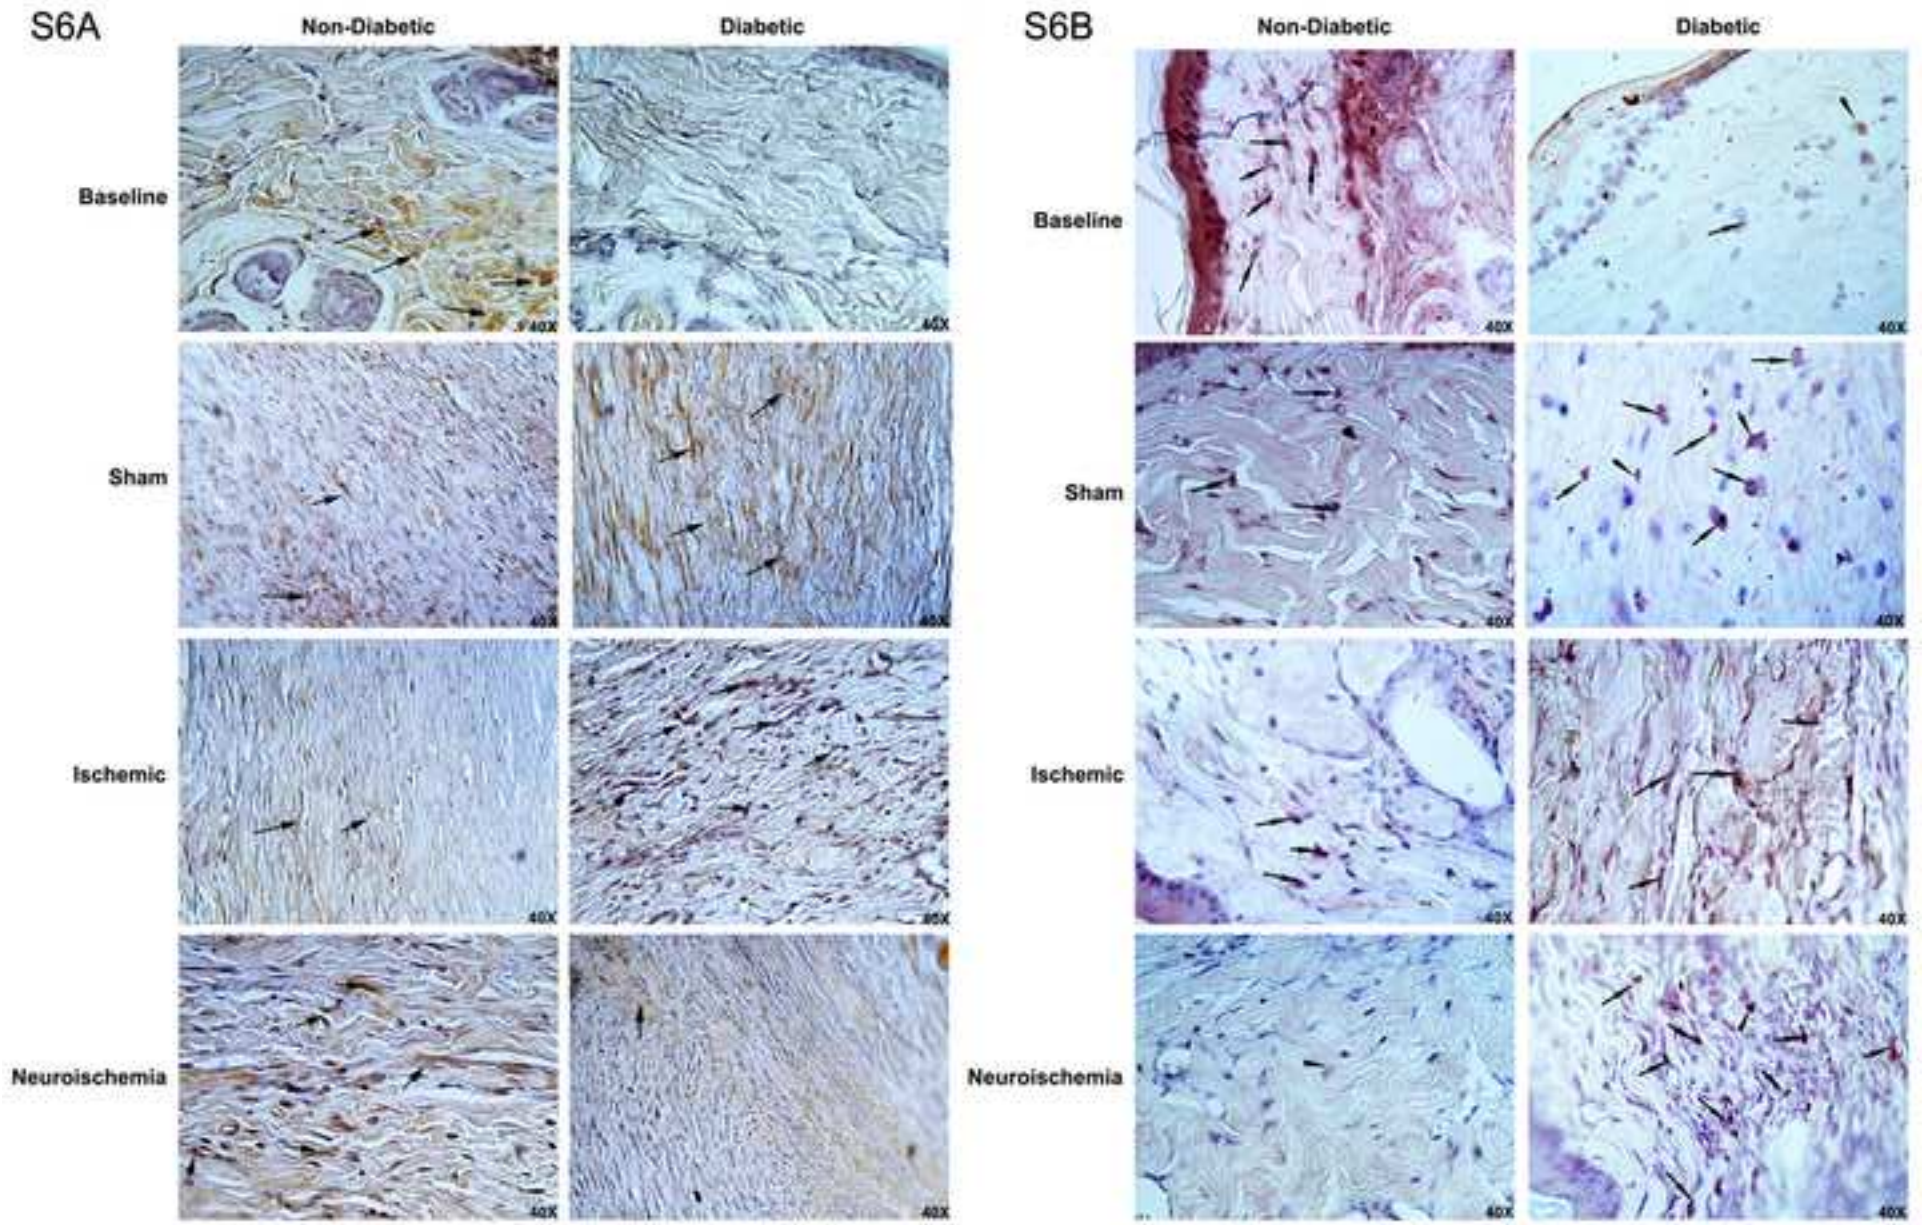

S7

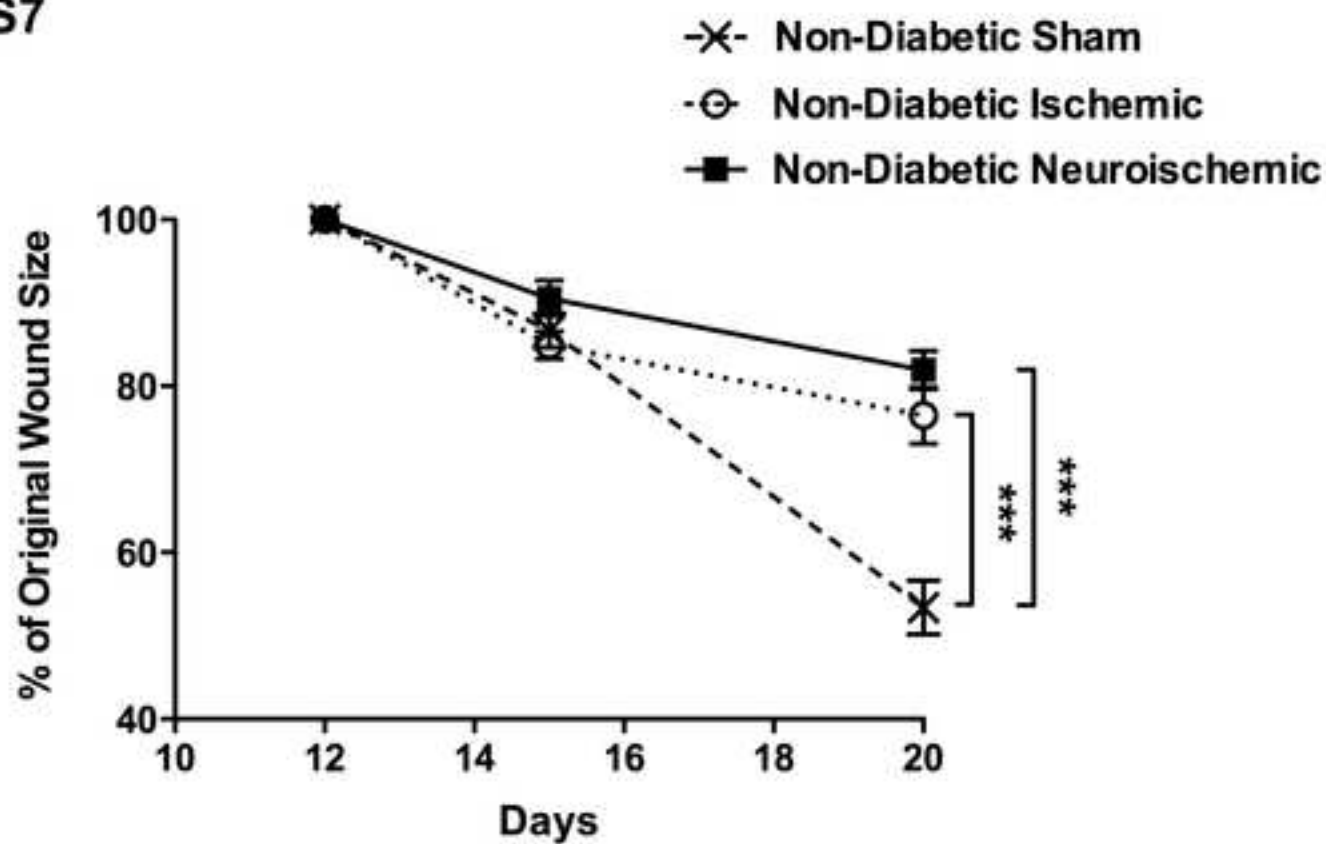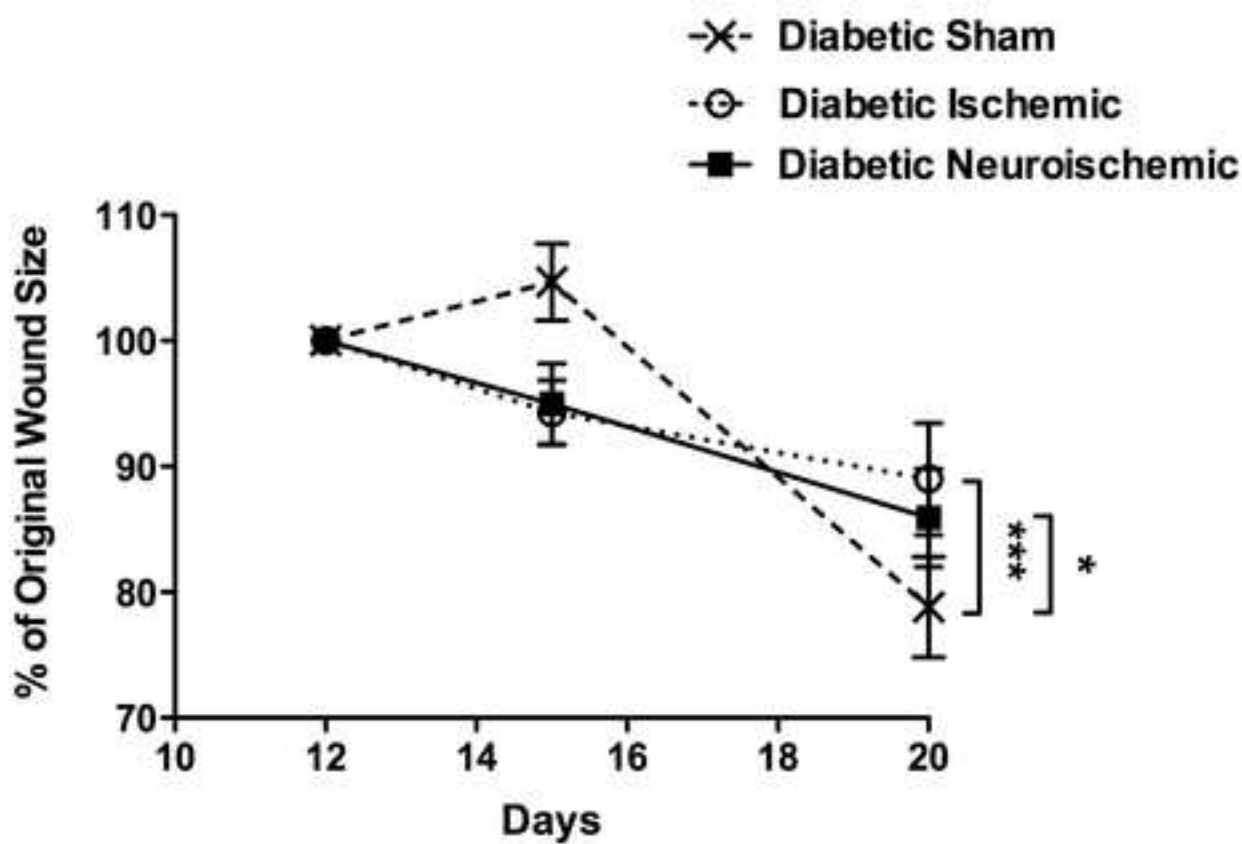



S8

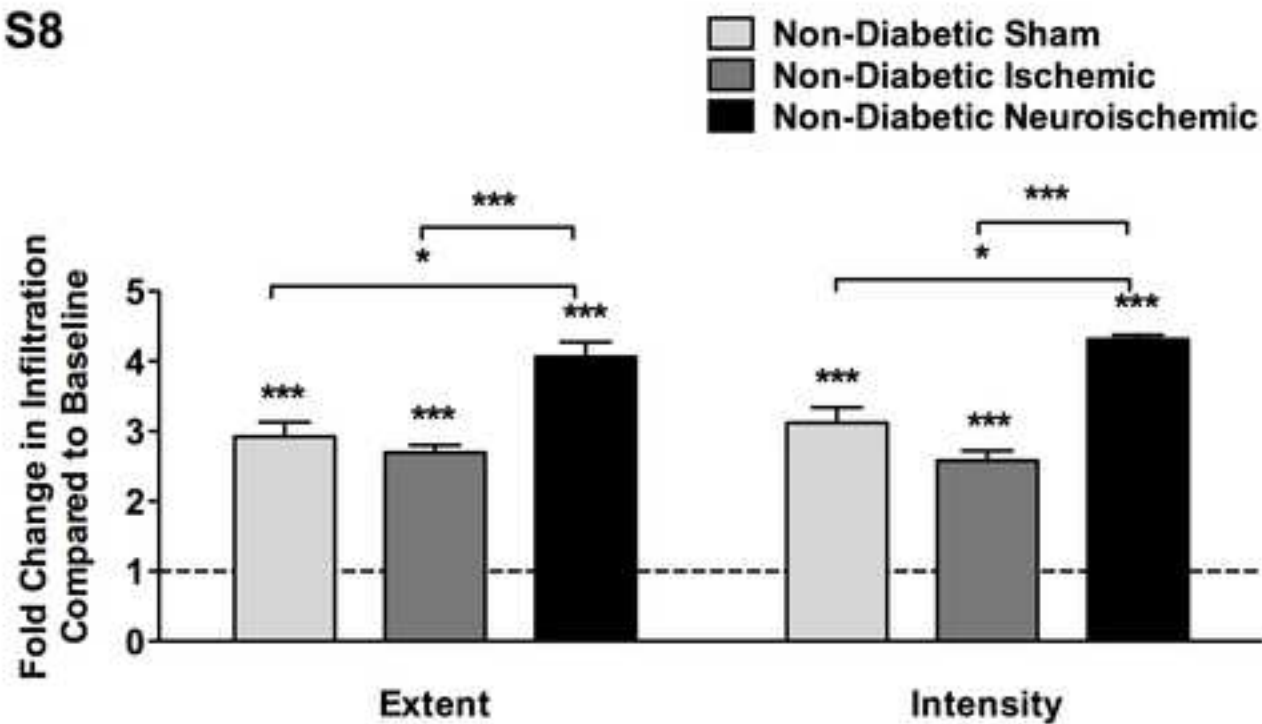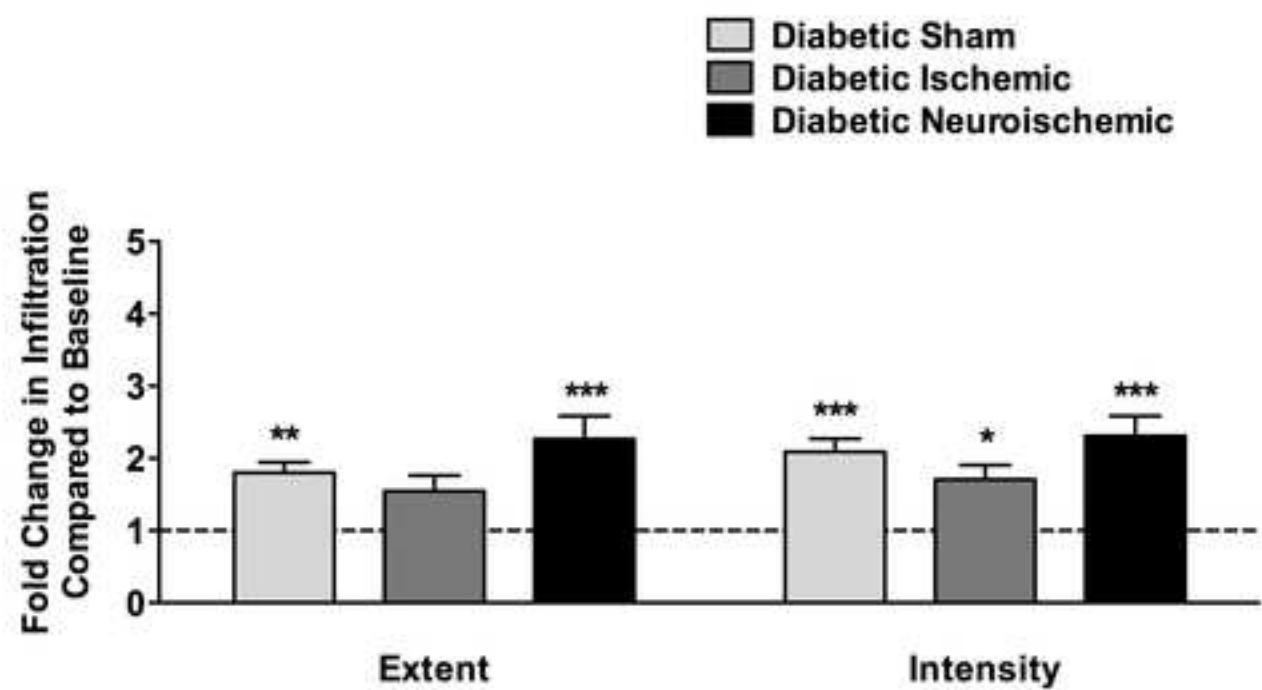

S9

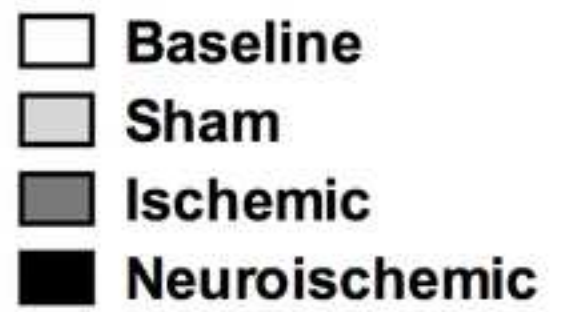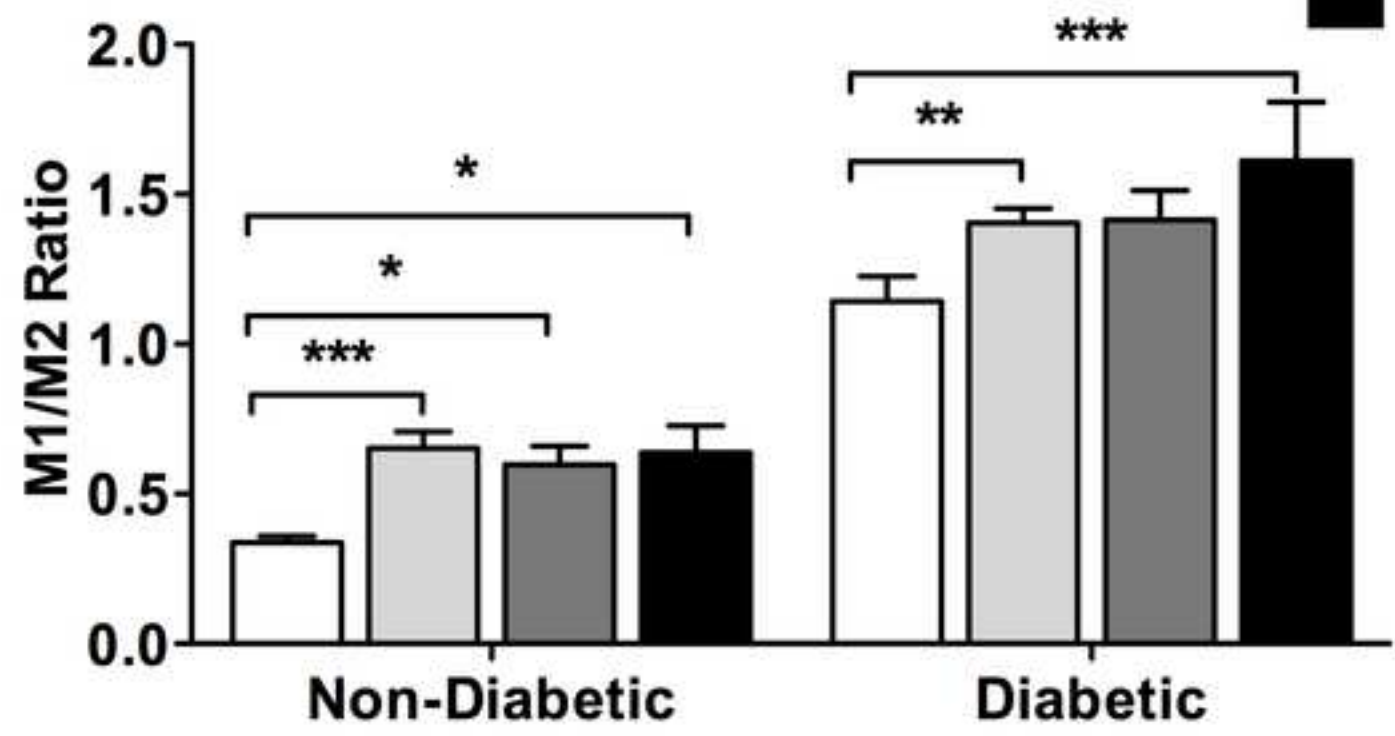

### S10A

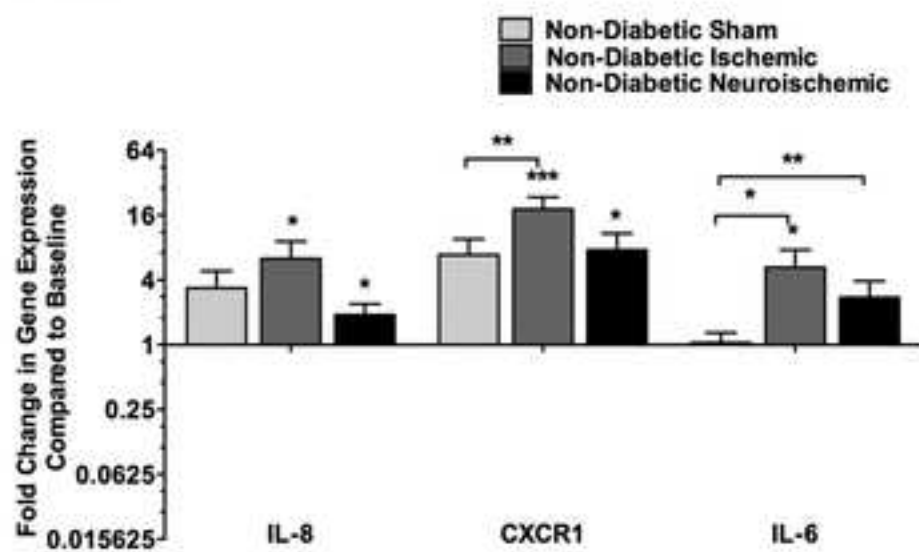

### S10B

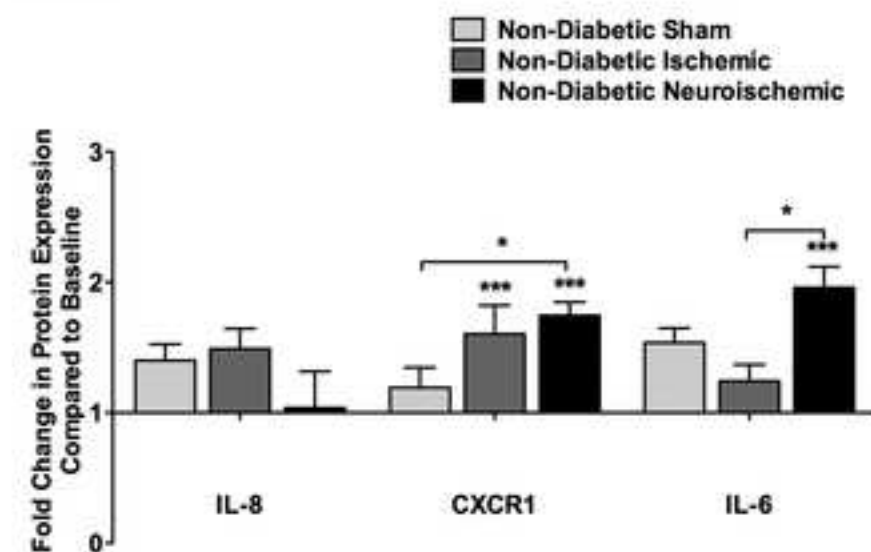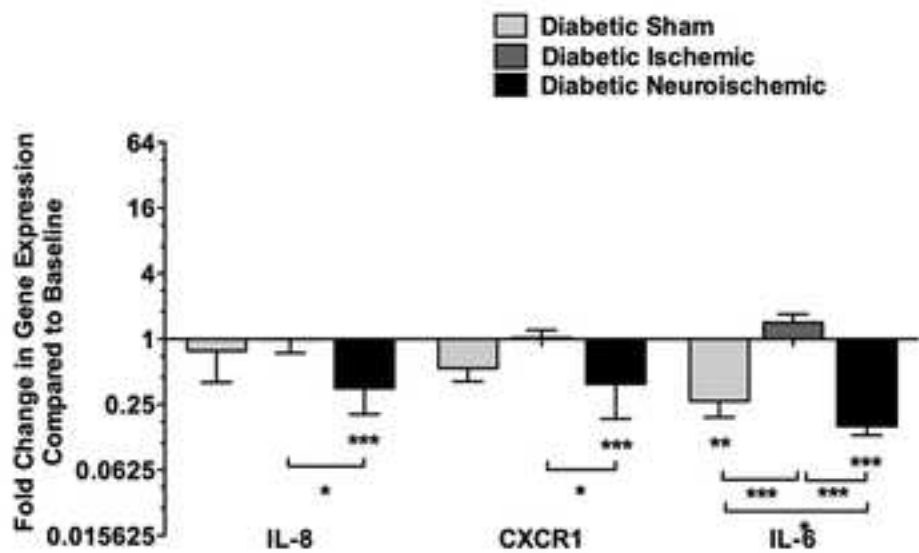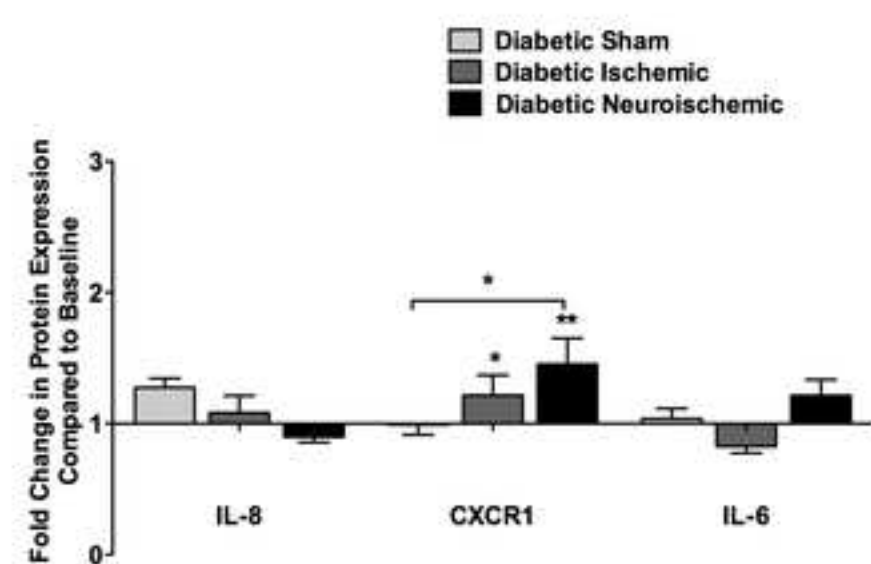

### S11A

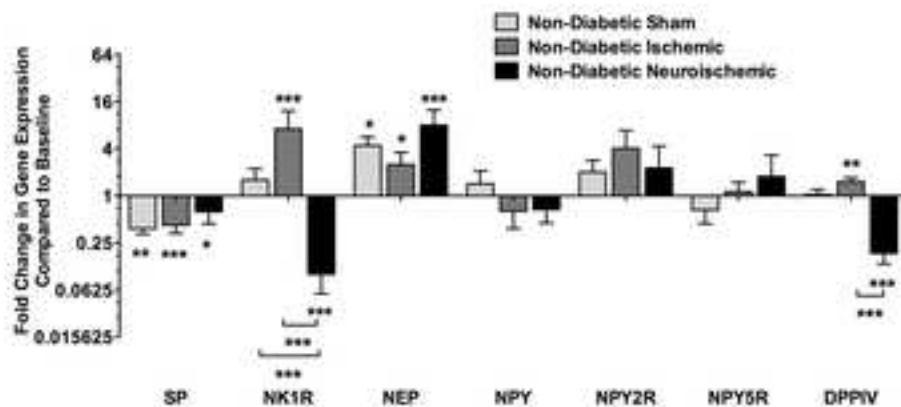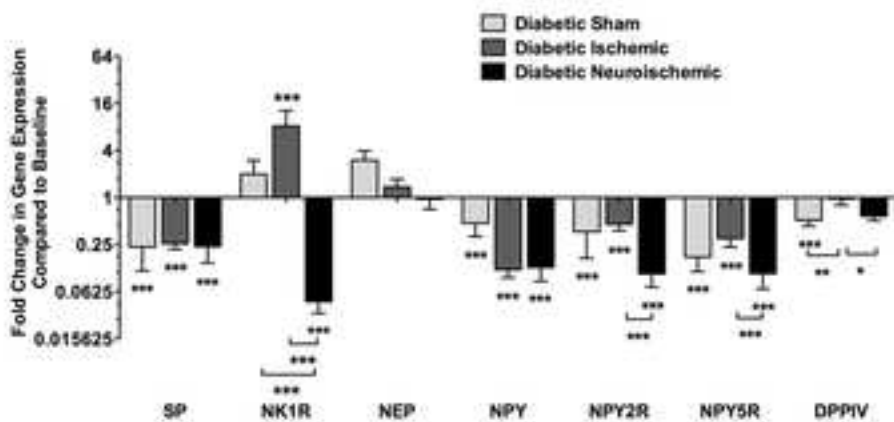

### S11B

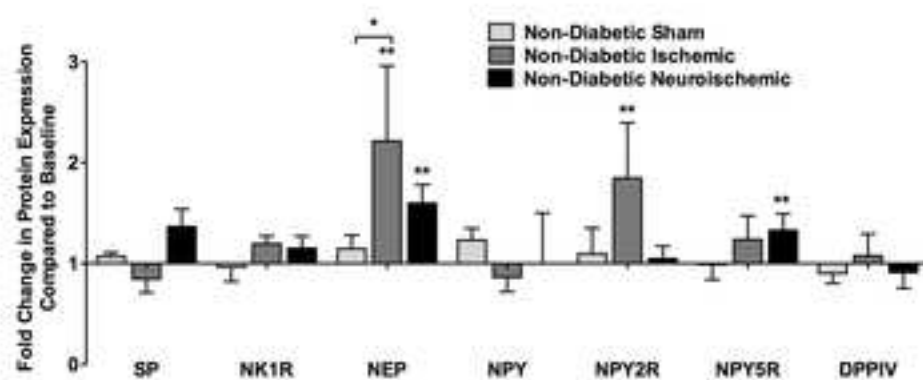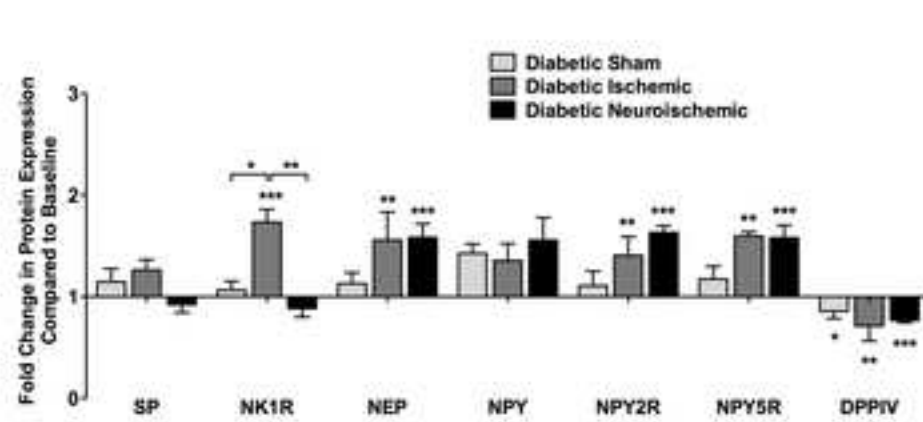

**SUPPLEMENTARY TABLE LEGENDS:**

**Table S1: Weight and blood glucose data:** Weight (Kg) and Fasting Blood Glucose (mg/dL) were obtained before alloxan administration (D0), on day of surgery (D10) and on day of euthanasia (D20). Results with significant changes are highlighted in the diabetic group. (N=6-18, mean±SEM, \*\*\*P<0.001).

**Table S2: Wound healing numerical data:** Data is presented as % of original wound size (Mean ± SEM). Comparisons are made between non-diabetic and diabetic groups. Results with significant changes are highlighted in the diabetic group. (N=6-18, mean±SEM, \*\*\*P<0.001 & \*P<0.05).

**Table S3: Leukocyte Infiltration data:** Data is presented as the score of extent and intensity of infiltration (Mean ± SEM). Comparisons are made between non-diabetic and diabetic groups. Results with significant changes are highlighted in the diabetic group. (N=5-6, mean±SEM, \*\*\*P<0.001, \*\*P<0.01 & \*\*P<0.01).

**Table S4: M1/M2 macrophage ratio:** Comparisons are made between non-diabetic and diabetic groups. Results with significant changes are highlighted in the diabetic group. (N=3-4, mean±SEM, \*\*\*P<0.001, \*\*P<0.01).

**Table S5: Gene expression numerical data:** Data is presented as relative gene expression (Mean ± SEM). Comparisons are made between non-diabetic and diabetic groups. Results with significant changes are highlighted in the diabetic group. (N=6-15, mean±SEM, \*\*\*P<0.001, \*\*P<0.01, \*P<0.05).

**Table S6: Protein expression numerical data:** Data is presented as relative protein expression (Mean  $\pm$  SEM). Comparisons are made between non-diabetic and diabetic groups. Results with significant changes are highlighted in the diabetic group. (N=4-6, mean $\pm$ SEM, \*P<0.05).

**Table S7: List of PCR Primers**

**Table S8: List of antibodies for Western Blot and Immunohistochemistry**

## **SUPPLEMENTARY FIGURE LEGENDS**

### **Fig.S1: Experimental set up and representative images of wounds:**

A) This schematic depicts the protocol timeline, treatment and surgical groups and an illustration of the rabbit ears indicating Ischemic/Neuroischemic and Sham ear. In the Ischemic/Neuroischemic ear, solid lines depict the incision site where the central and the rostral arteries are ligated along with the central and rostral nerves. Dashed lines in the sham ear depict incision site where the central and rostral artery and nerve are dissected but left intact.

B) Wound-healing was monitored over 10-day period from D10-D20. Photographs were obtained on D12, D15 and D20 using Medical Hyperspectral Imaging camera. Representative images are from non-diabetic and diabetic treatment groups of Sham, Ischemic and Neuroischemic wounds obtained on D20

**Fig.S2: Representative H&E images the wounds indicating leukocyte infiltration.** Formalin fixed paraffin embedded H&E stained 6 $\mu$ m cross-sections were analyzed for leukocyte infiltration. Representative images close to the wound margin are from non-diabetic and diabetic treatment groups and at Baseline and, Sham, Ischemic and Neuroischemic wounds (Mag =10X & 40X). Arrows indicate staining for immune cells.

**Fig.S3: Representative images of A) M1+ and, B) M2+ macrophage infiltration:** OCT embedded 6 $\mu$ m tissue sections were stained for macrophage marker CD18 and, co-stained for M1 macrophage activation marker HLA-DR or M2 macrophage activation marker CD206. Representative images close to the wound margin are from non-diabetic and diabetic treatment groups at Baseline and, Sham, Ischemic and Neuroischemic wounds (Mag = 5X). Merged

images (yellow/orange) of HLA-DR+ (red) and CD18+ (green) M1 macrophages and merged images (yellow/orange) of CD206+ (red) and CD18+ (green) M2 macrophages were obtained using standard fluorescent microscopy.

**Fig.S4: Representative image of western blot analysis:** Representative western blot of CXCR1, NK1R, NPY2R, NPY5R, NEP and DPPIV. Beta actin was used as a loading control. Blots are from non-diabetic and diabetic treatment groups at Baseline (B) and, Sham (S), Ischemic (I) and Neuroischemic (NI) wounds.

**Fig.S5: Representative immunohistochemistry images of A) IL-8 and, B) IL6.** OCT embedded 6 $\mu$ m frozen cross-sections were fixed with acetone and stained with IL-8 primary antibody. Formalin fixed paraffin embedded 6 $\mu$ m cross-sections were stained IL-6 primary antibody. Representative images close to the wound margin are from non-diabetic and diabetic treatment groups at Baseline and, Sham, Ischemic and Neuroischemic wounds (Mag=40X). Arrows indicate staining for IL-8 or IL-6.

**Fig.S6: Representative immunohistochemistry images of A) Substance P (SP) and, B) Neuropeptide Y (NPY).** Paraffin embedded 6 $\mu$ m cross-sections were stained with SP or NPY primary antibody. Representative images close to the wound margin are from non-diabetic and diabetic.

**Fig.S7: Wound Healing: Comparison between wound types (sham, ischemic and neuroischemic) within non-diabetic and diabetic treatment groups:** Data is expressed as



percent change in wound area pixels of non-diabetic and diabetic rabbits from days 2 to 10 (n=6-12, \*\*\*P<0.001).

**Fig.S8: Leukocyte Infiltration: Comparison between wound types (sham, ischemic and neuroischemic) within non-diabetic and diabetic treatment groups:** H&E stained cross-sections were analyzed for leukocyte infiltration. An arbitrary scale of 1-5 was used for grading entire cross-sections. Grading was performed on the basis of extent of infiltration (distance the cells migrated from the wound margin) and intensity of infiltration (# of infiltrating cells). Data are presented in the form of arbitrary scores. (N=5-6, mean±SEM, \*\*\*P<0.001 & \*\*P<0.01).

**Fig.S9: Macrophage Infiltration (M1/M2 ratio): Comparison between wound types (sham, ischemic and neuroischemic) within non-diabetic and diabetic treatment groups:** Tissues were stained for M1 specific and M2 specific macrophages as described before. An arbitrary scale of 1-5 was used for grading cross-section images. M1/M2 ratio was obtained based on arbitrary scores. (N=3-4, mean±SEM, \*\*\*P<0.001, \*\*P<0.01).

**Fig.S10: Cytokines and Their Receptor: Post-injury comparison in the expression of IL-8, CXCR1 and IL-6 between wound types (sham, ischemic, neuroischemic) within non-diabetic and diabetic treatment groups:**

**A) Gene Expression:** Using standard Q-RT-PCR and  $2^{-\Delta\Delta Ct}$  analysis method, gene expression was analyzed. Data are expressed as change of expression over the baseline in non-diabetic and diabetic rabbit wounds (n=5-6, \*\*\*P<0.001, \*\*P<0.01, P<0.05).

**B) Protein Expression:** Using standard western blot and immunohistochemistry methods, protein expression was analyzed. For western blot quantification, densitometry was used. For immunohistochemistry quantification, an arbitrary scale of 1-5 was used for grading entire cross-sections. Data expressed as change of expression over the baseline in non-diabetic and diabetic rabbit wounds (n=4-6, \*\*\*P<0.001, \*\*P<0.01, P<0.05).

**Fig.S11: Neuropeptide and Their Receptor: Post-injury comparison in the expression of SP, NK1R, NEP, NPY, NPY2R, NPY5R and DPPIV between wound types (sham, ischemic, neuroischemic) within non-diabetic and diabetic treatment groups:**

**A) Gene Expression:** Using standard Q-RT-PCR and  $2^{-\Delta\Delta Ct}$  analysis method, gene expression was analyzed. Data are expressed as change of expression over the baseline in non-diabetic and diabetic rabbit wounds (n=5-6, \*\*\*P<0.001, \*\*P<0.01, P<0.05).

**B) Protein Expression:** Using standard western blot and immunohistochemistry methods, protein expression was analyzed. For western blot quantification, densitometry was used. For immunohistochemistry quantification, an arbitrary scale of 1-5 was used for grading entire cross-sections. Data expressed as change of expression over the baseline in non-diabetic and diabetic rabbit wounds (n=4-6, \*\*\*P<0.001, \*\*P<0.01, P<0.05).
